# Supplementary material
Source: publisher figshare collection journal article supplement (https://frontiersin.figshare.com/ndownloader/files/26614586)
Supplement: Supplementary file [file 26614586]

# Supporting Information

## FIGURE S1

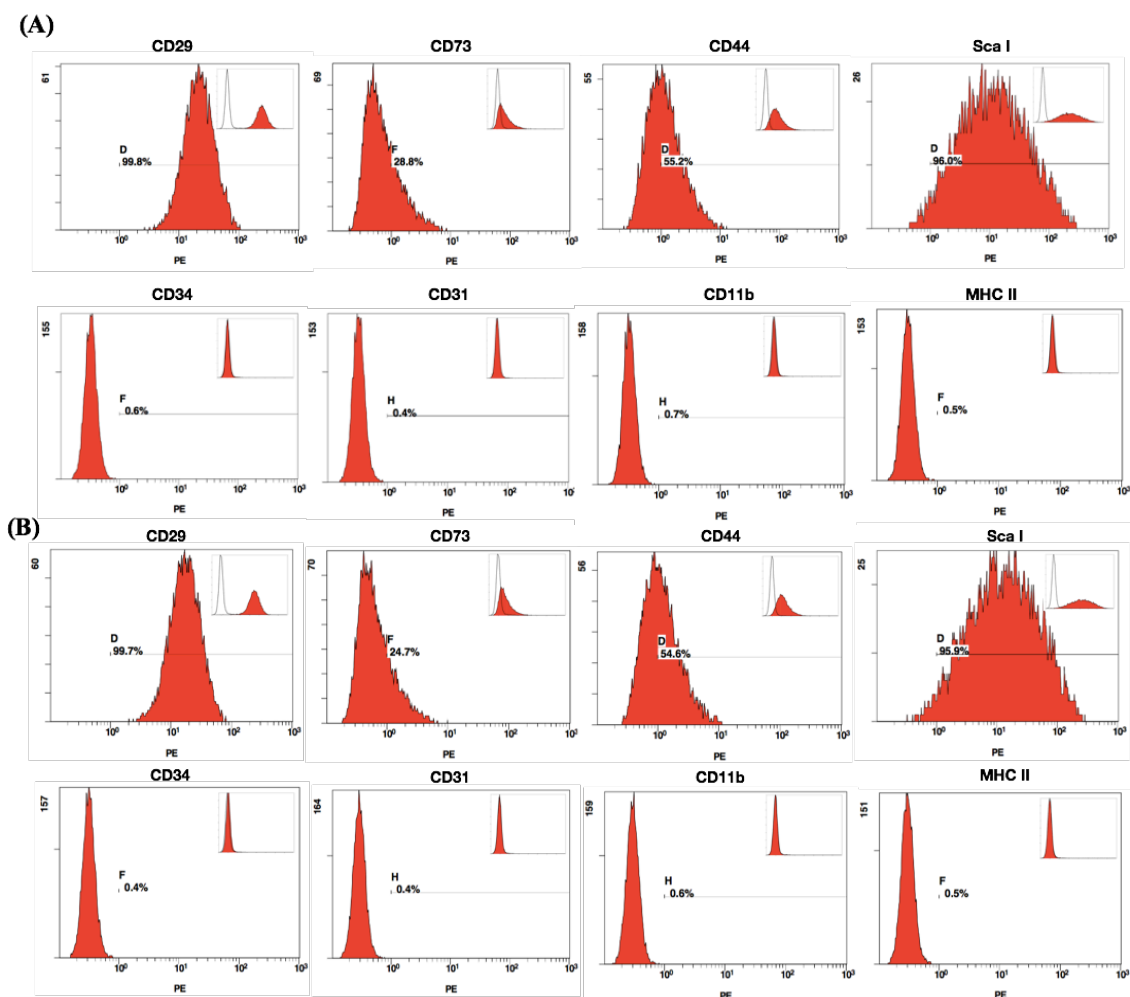

**Figure S1. Surface markers expression profile analysis of MSCs by flow cytometry**

Flow cytometric analysis was performed for MSCs at passage 2, derived from 15-16 weeks of *Dnmt3l* KO mice and wild type littermates (3 mice of each genotype), respectively. As expected, **(A)** wild type and **(B)** *Dnmt3l* KO MSCs were positive for MSCs markers (CD29, CD73, CD44 and Sca I), but negative for hematopoietic lineages markers (CD34 and CD11b), endothelial markers (CD31) and also showed low expression of MHC II. The black line indicates the respective isotype control.

Supporting Information  
FIGURE S2

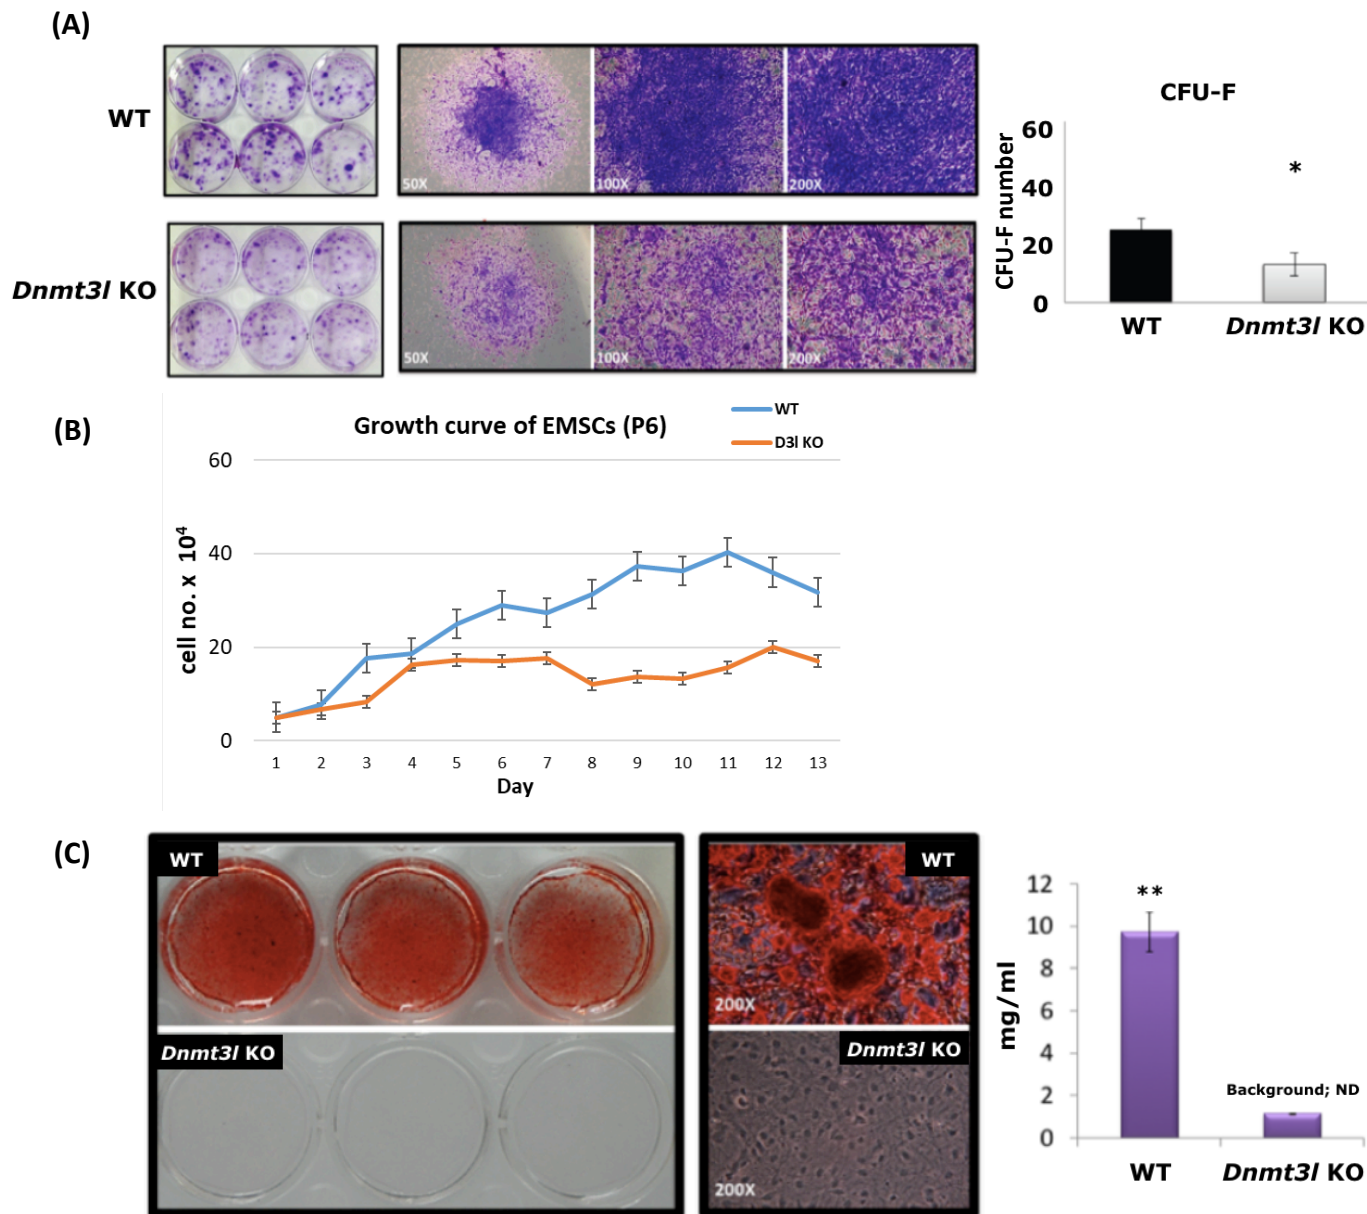

**Figure S2. *Dnmt3l* deficiency impeded MSCs self-renewal potential and osteogenesis ability in an epiphysis-derived MSC (EMSCs) subtype**

(A) The lack of *Dnmt3l* also impaired CFU-F forming efficiency in the EMSCs subtype at passage 4 (The cells were seeded at a density of 1000 cells per  $\text{cm}^2$  in 6 well). (B) Reduced proliferation activity was observed in *Dnmt3l* KO mice derived EMSCs. (C) Osteogenesis of EMSC from WT and *Dnmt3l* KO mice were determined by Alizarin Red S staining at 7 days of osteogenic induction. Data presented as mean  $\pm$  SEM. \*  $p < 0.05$ , \*\*  $p < 0.01$ . A representative batch of experiment was presented. Independent experiments of MSCs from different batches of mice gave similar results.

Supporting Information  
**FIGURE S3**

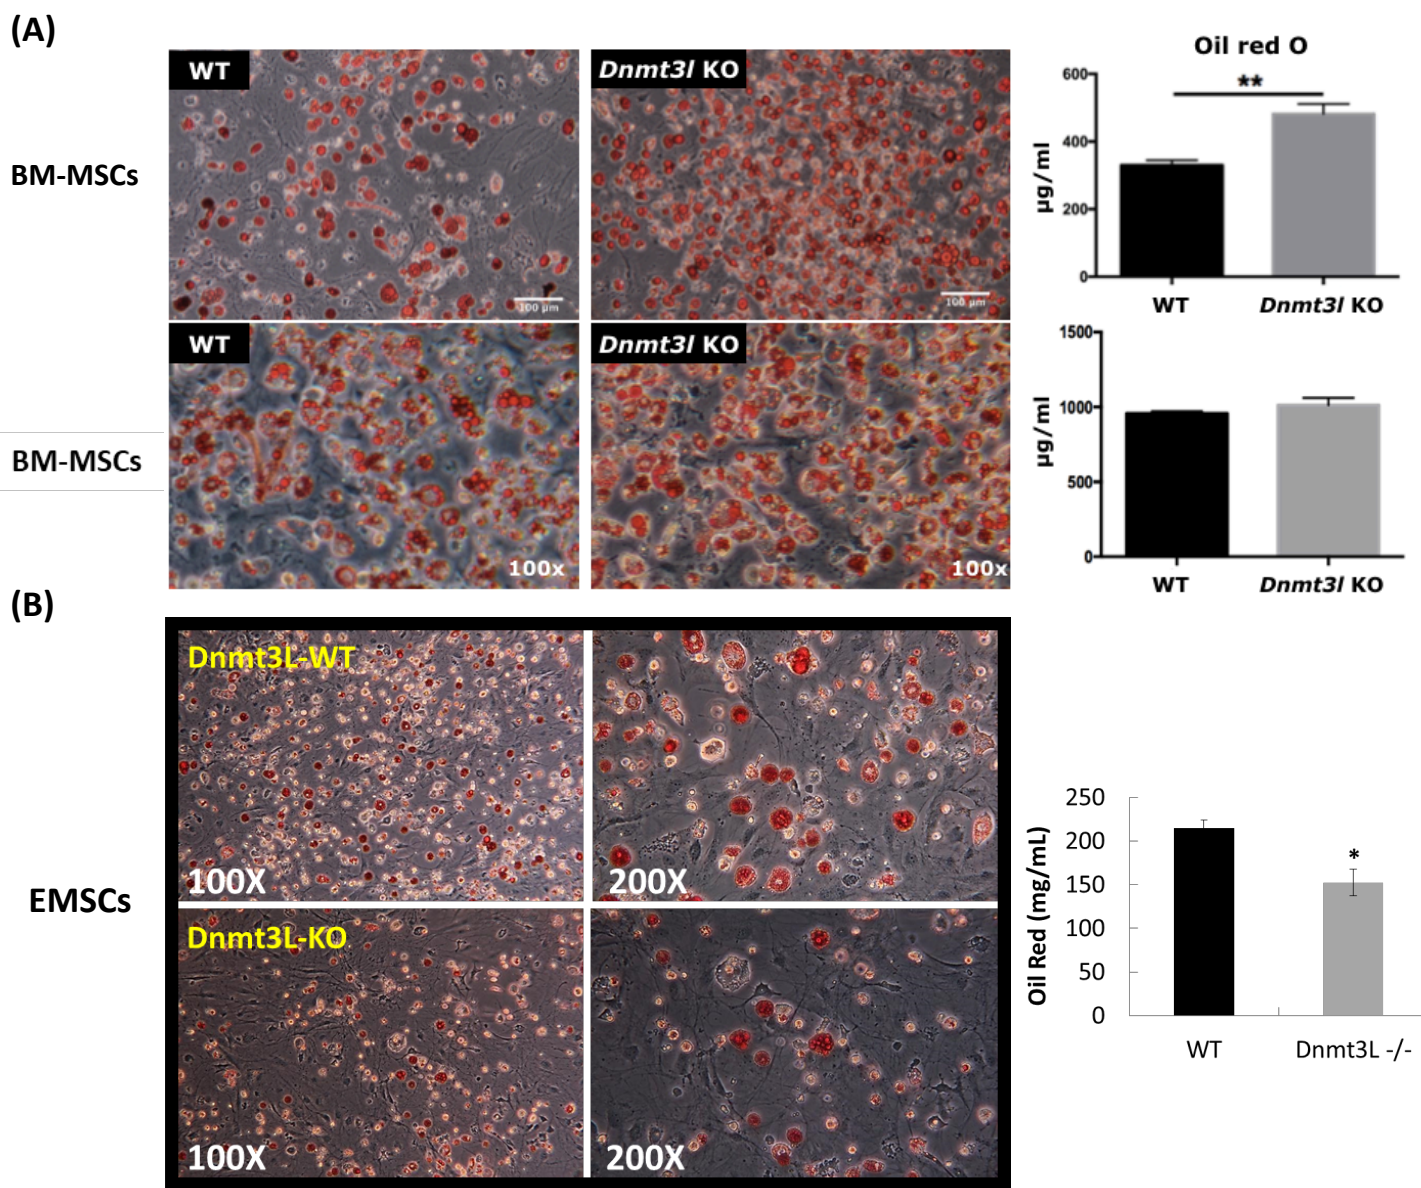

**Figure S3. Adipogenesis activity observed from *Dnmt3l* KO BM-MSCs and EMSCs.**

(A) Adipogenic capability was characterized by oil red O staining after 7 days of induction at passage 4. For quantification, oil red O-stained cells were solubilized at DMSO and the absorbance was measured spectrophotometrically at 570 nm. BM-MSCs derived from *Dnmt3l* KO mice had either equivalent or higher adipogenic potential compared to WT from different batches. (B) *Dnmt3l* KO EMSCs, on the other hand, have 30% reduced adipogenesis activity. Compared to the profound impairment on calcium deposition after osteogenic induction, the *Dnmt3l* genotype effect on adipogenesis was relatively mild and subject to batch and MSC origin effect. Data presented as mean  $\pm$  SEM. \*  $p < 0.05$ , \*\*  $p < 0.01$ .

Supporting Information  
FIGURE S4

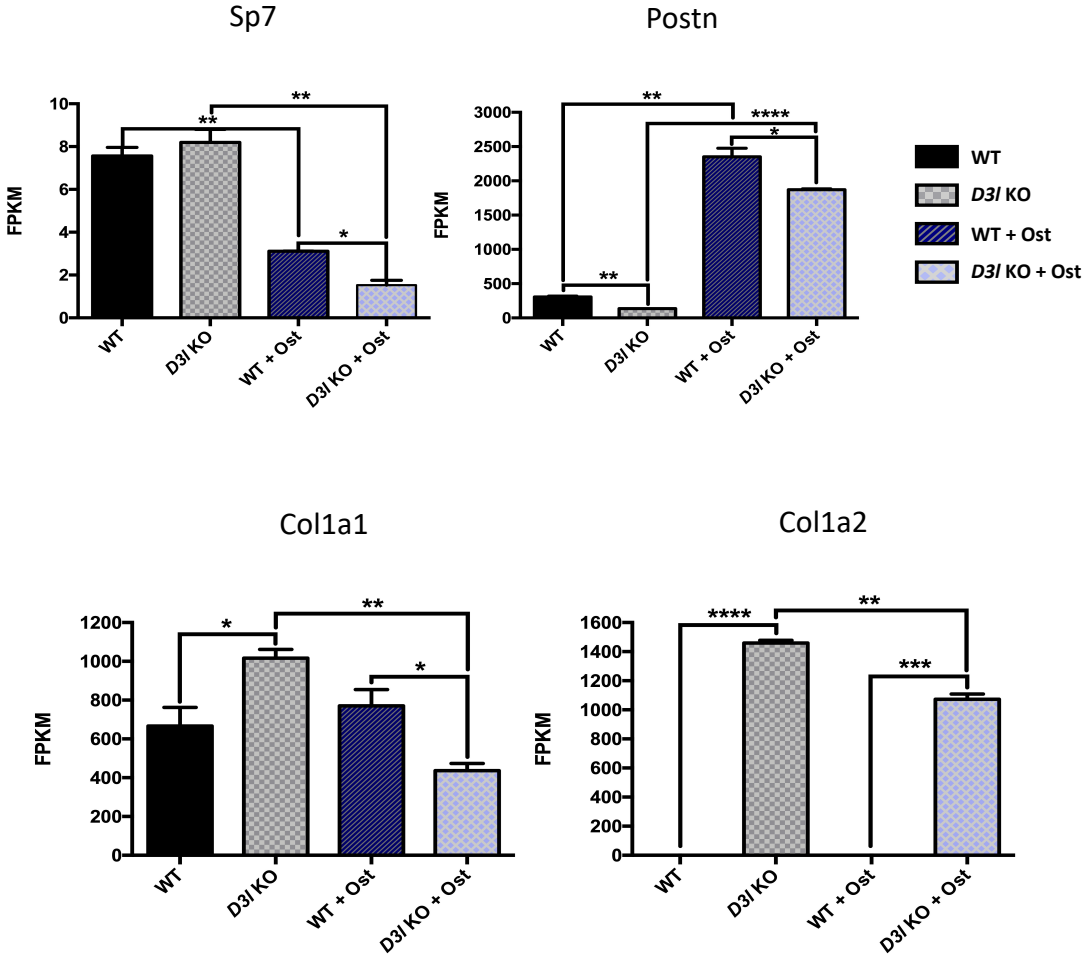

**Figure S4. Analysis of candidate osteogenesis related gene expression in WT and *Dnmt3l* KO mice-derived MSCs before and during *in vitro* osteogenesis**

Relative expression levels of candidate genes normalized by fragments per kilobase per million consolidated from our strand-specific transcriptome sequence datasets. Two-tail, unpaired *t*-test were used in all statistical analysis in this figure. *D3I* KO and WT represent undifferentiated passage 4 MSCs initially isolated from homozygous *Dnmt3l* KO animals or their wild type littermate; +Ost represents differentiating MSCs 3 days after osteogenesis induction.



Supporting Information  
FIGURE S5

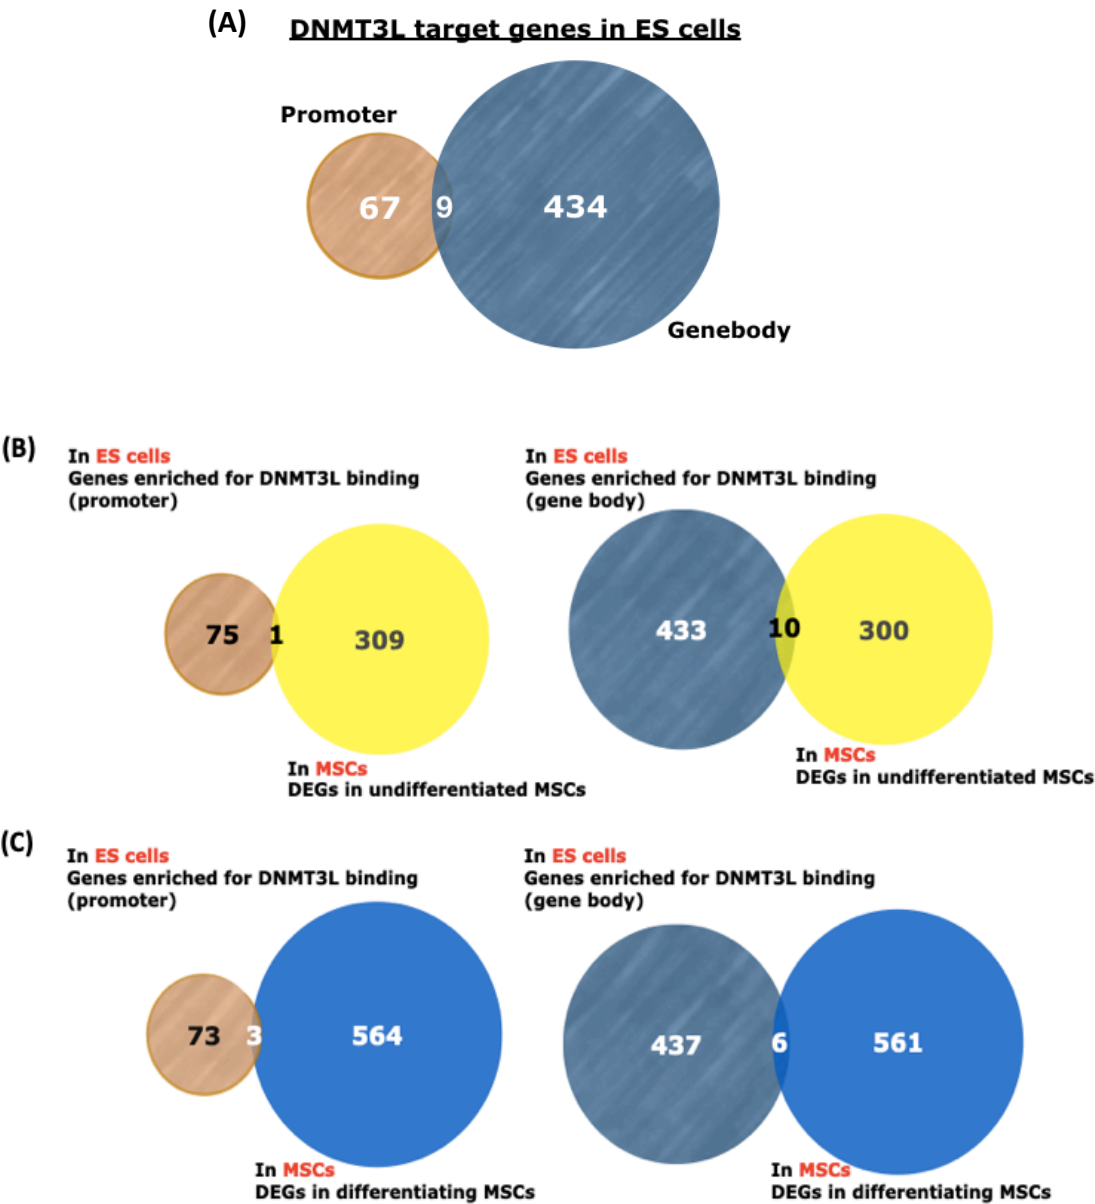

**Figure S5. DNMT3L binding sites in ES cells and the limited correlation with the *Dnmt3l* genotype-dependent DEGs in undifferentiated and differentiating MSCs**  
(A) The number of DNMT3L targeted genes on promoter and gene body regions. (The 5 kb interval upstream of TSS were considered as putative promoter region) (B) Only 1 out of 308 DEGs between undifferentiated MSCs derived from WT and *Dnmt3l* KO mice are direct DNMT3L binding targets at promoter in ES cells (Left panel;  $p=0.616$ ). Ten out of 308 DEGs between undifferentiated MSCs derived from WT and *Dnmt3l* KO mice are DNMT3L binding targets at gene body in ES cells (Right panel;  $p=0.0584$ ). (C) Three out of 567 DEGs between differentiating MSCs derived from WT and *Dnmt3l* KO mice are DNMT3L binding targets at promoter in ES cells (Left panel;  $p=0.260$ ). Six out of 567 DEGs between differentiating MSCs derived from WT and *Dnmt3l* KO mice are DNMT3L binding targets at gene body in ES cells (Right panel;  $p=0.984$ ). P values were calculated by hypergeometric test.

Supporting Information  
FIGURE S6

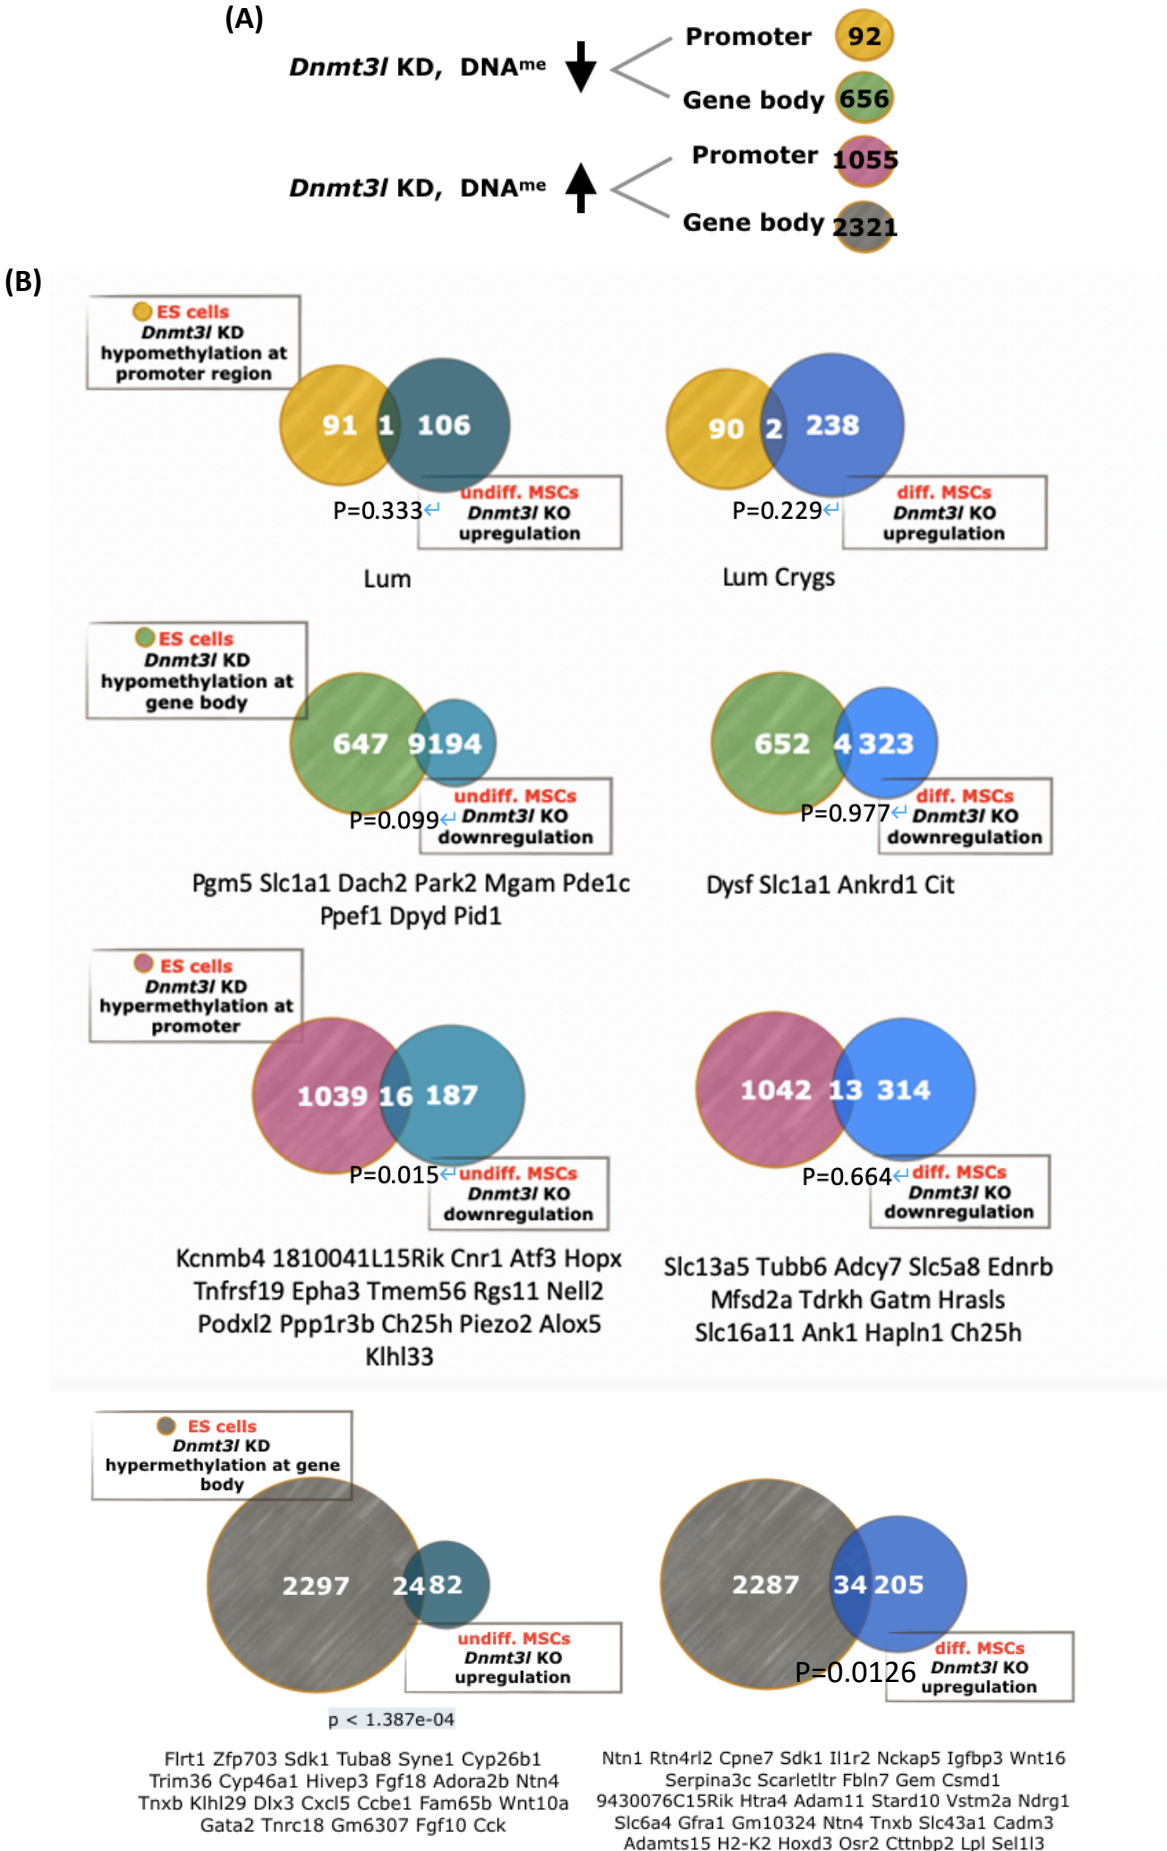

**Figure S6. The relatively higher proportion of DEGs between *Dnmt3l* KO and WT MSCs are overlapped with genes bearing DNMT3L-associated gene body DNA methylation in ES cells**

(A) Among the 748 genes hypomethylated in *Dnmt3l* KD ES cells compared to WT counterparts, 92 genes are hypomethylated at putative promoter regions and the other 656 genes at gene body regions. In contrast, 3376 genes are hypermethylated in *Dnmt3l* KD ES cells compared with WT, of which 1055 genes are hypermethylated at putative promoter regions and the other 2321 genes at gene body regions. We define the 5kb upstream of TSSs as putative promoter regions. (B) DNA methylation on the promoter usually resulted in downregulation of gene expression. We therefore compared the 92 genes (yellow circle) with hypermethylated promoter in wild type ES cells, with the up-regulated genes in undifferentiated and differentiating *Dnmt3l* KO MSCs. Only 1 and 2 genes were overlapped, respectively, indicating DNA methylation on the putative promoter regions in the ES cells, were less likely to be carried over to MSCs to affect gene expression. On the other hand, 1055 genes (pink circle) with promoter hypermethylation in *Dnmt3l* KD ES cells were compared with the down-regulated genes in undifferentiated and differentiating *Dnmt3l* KO MSCs. Since DNA methylation on gene body generally resulted in upregulation of gene expression, the 656 genes (green circle) with gene body hypomethylation in *Dnmt3l* KD ES cells were compared with the down-regulated genes in undifferentiated and differentiating *Dnmt3l* KO MSCs. The 2321 genes (gray circle) with gene body hypermethylation in *Dnmt3l* KD ES cells are compared with the up-regulated genes in undifferentiated and differentiating *Dnmt3l* KO MSCs. Higher proportion (24/106) of *Dnmt3l* genotype dependent differentially expressed genes in undifferentiated MSCs correlated to genes with gene body methylation in embryonic stem cells. P values were calculated by hypergeometric test.

Supporting Information  
FIGURE S7

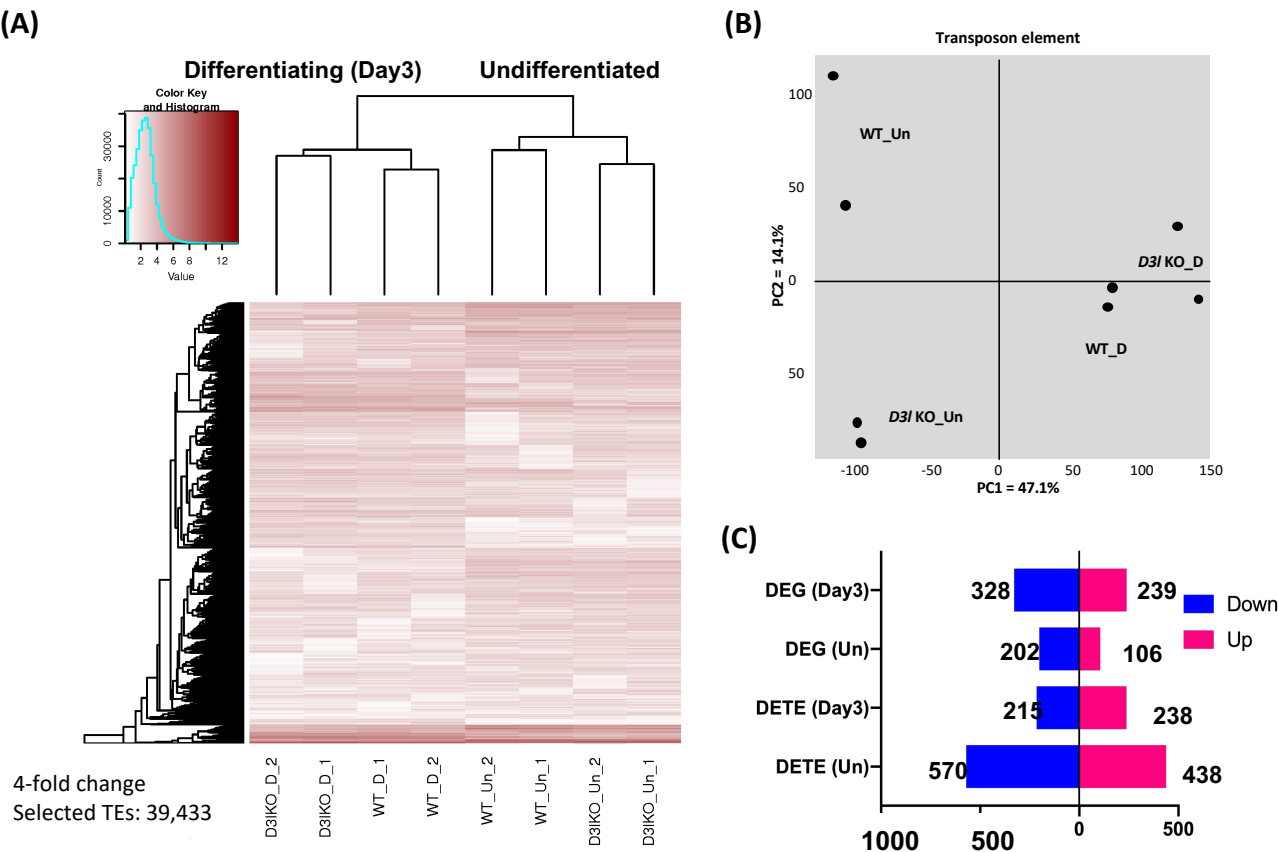

**Figure S7. Genotype and differentiation mediated differential expression of transposable elements**  
(A) Global transposon element expression in undifferentiated and differentiating (day 3 of osteogenic induction) MSCs derived from WT and *Dnmt3l* KO mice. (B) Principal Component Analysis (PCA) of transposon element expression. (C) The number of DEGs and DETEs between WT and *Dnmt3l* KO in undifferentiated and osteogenic differentiating MSCs.



Supporting Information  
**FIGURE S8**

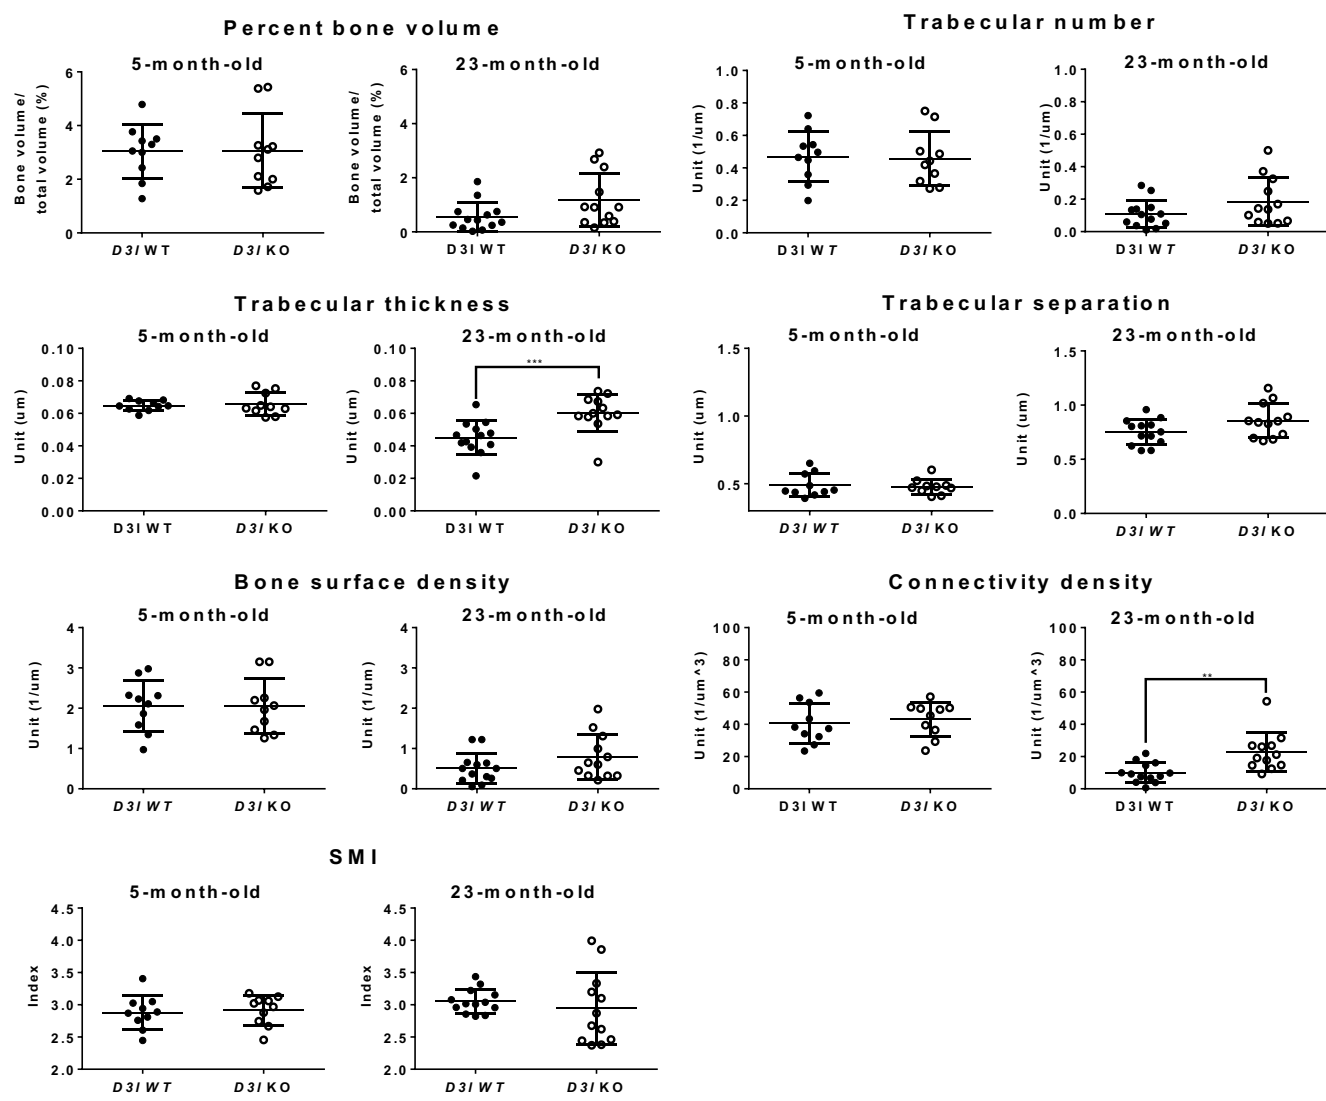

**Figure S8. Trabecular parameters analyzed from 5-month- and 23-month-old paired *Dnmt3l* female KO mice and wild type littermates**

Bone volume, trabecular numbers, trabecular thickness, Trabecular separation, bone surface density, connectivity density and structure model index (SMI) were compared between (A) 5-month-old and 23-month-old WT and *Dnmt3l* KO female mice. *Dnmt3l* KO genotype surprisingly have protective effect against aging associated connectivity density and trabecular thickness reduction phenotype. Statistic differences were analyzed by Mann-Whitney test. P<0.05\*, <0.01\*\*, <0.001\*\*\* and <0.0001\*\*\*\*.

Supporting Information  
**FIGURE S9**

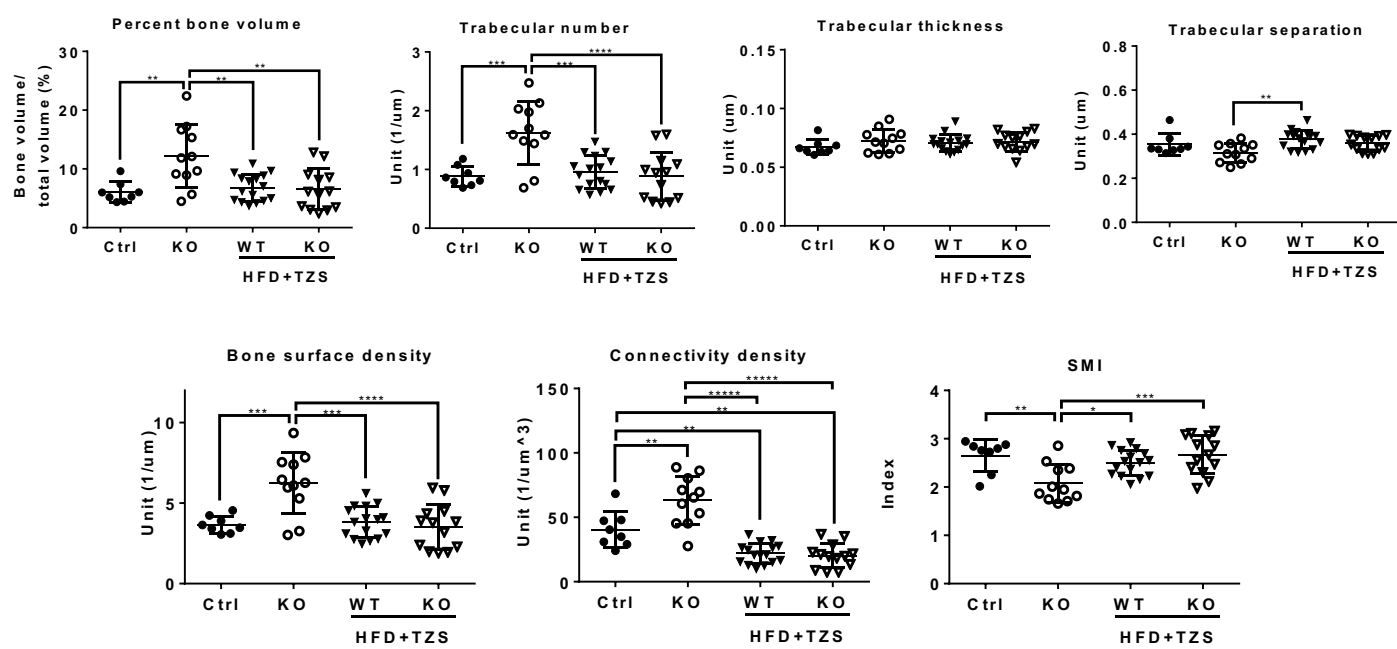

**Figure S9. *Dnmt3l* KO male mice demonstrated better bone quality compared with heterogeneous *Dnmt3l*<sup>+/-</sup> and WT male littermates but sensitized to high fat diet plus an experimental jet-lag paradigm/Time zone shifting (H+T).** Bone volume, trabecular numbers, trabecular thickness, Trabecular separation, bone surface density, connectivity density and structure model index (SMI) were compared between 7 to 8-months-old *Dnmt3l* WT/heterogeneous and *Dnmt3l* KO male mice with breeding diet (untreated) or with “H+T”: high fat diet (#D12492, Research diets) plus an experimental jet-lag paradigm: the 6-months-old experimental mice were fed with high fat diet accompanied with light/dark cycle shifting forward for 6 hours/week until the mice became 8-month-old. Control WT and *Dnmt3l* KO mice were kept in normal light/dark cycle and fed with breeding diet. Statistic differences were analyzed by one-way ANOVA with Tukey’s test. P<0.05\*, <0.01\*\*, <0.001\*\*\* and <0.0001\*\*\*\*.

**Table S1. Summary of RNA-Seq data of osteolineage differentiating and undifferentiated BM-MSCs derived from WT and *Dnmt3l* KO mice**

| Samples               | Samples description                                                           | Raw reads  | Mapped reads | Mappability (%) |
|-----------------------|-------------------------------------------------------------------------------|------------|--------------|-----------------|
| WT_Un_1               | WT, undifferentiated MSCs                                                     | 65,896,914 | 63,480,135   | 96.3            |
| WT_Un_2               |                                                                               | 67,218,537 | 65,137,093   | 96.9            |
| WT_D_1                | WT MSCs on day 3 of differentiation towards osteoblasts                       | 90,747,616 | 86,985,776   | 95.9            |
| WT_D_2                |                                                                               | 68,753,361 | 66,094,575   | 96.1            |
| <i>Dnmt3l</i> KO_Un_1 | <i>Dnmt3l</i> KO derived undifferentiated MSCs                                | 65,743,245 | 62,254,628   | 94.7            |
| <i>Dnmt3l</i> KO_Un_2 |                                                                               | 72,705,565 | 66,035,878   | 90.8            |
| <i>Dnmt3l</i> KO_D_1  | <i>Dnmt3l</i> KO derived MSCs on day 3 of differentiation towards osteoblasts | 66,684,124 | 64,244,082   | 96.3            |
| <i>Dnmt3l</i> KO_D_2  |                                                                               | 67,805,802 | 64,496,488   | 95.1            |

\*Read length = 51 bp

**Table S2. Number of differentially expressed transposons in primary subfamilies**

| Family       | Total number | Undifferentiated |      | Differentiating |      |
|--------------|--------------|------------------|------|-----------------|------|
|              |              | up               | down | up              | down |
| DNA          |              |                  |      |                 |      |
| hAT-Charlie  | 105,698      | 10               | 20   | 9               | 3    |
| TcMar-Tigger | 35,118       | 2                | 8    | 2               | 3    |
| hAT-Tip100   | 9,436        | 1                | 0    | 2               | 1    |
| LINE         |              |                  |      |                 |      |
| L1           | 905,228      | 135              | 60   | 32              | 15   |
| L2           | 67,909       | 7                | 18   | 11              | 3    |
| CR1          | 14,155       | 2                | 2    | 4               | 1    |
| SINE         |              |                  |      |                 |      |
| Alu          | 574,557      | 56               | 97   | 30              | 36   |
| B4           | 397,726      | 33               | 37   | 14              | 87   |
| B2           | 372,923      | 37               | 53   | 28              | 10   |
| MIR          | 120,436      | 13               | 21   | 16              | 6    |
| LTR          |              |                  |      |                 |      |
| ERVL-MaLR    | 454,918      | 66               | 67   | 19              | 17   |
| ERVK         | 323,502      | 34               | 132  | 50              | 14   |
| ERVL         | 118,581      | 15               | 10   | 6               | 3    |
| ERV1         | 72,095       | 15               | 4    | 6               | 3    |
| total        |              | 426              | 529  | 229             | 202  |
